# Supplementary figures and images for: Network dynamics underlying OFF responses in the auditory cortex
Source: eLife journal article supplement (doi:10.7554/elife.53151), 2021-03-24

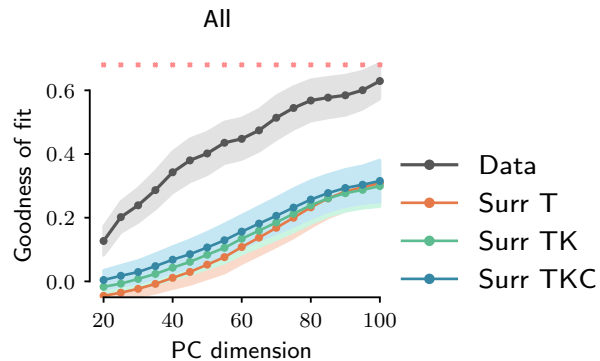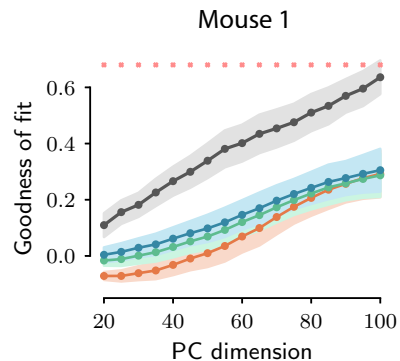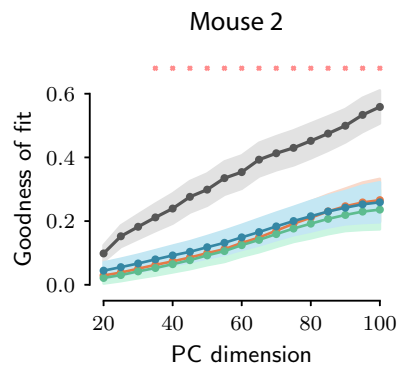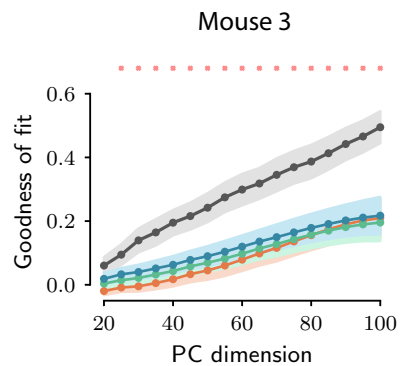

Supplement: supp [file elife-53151-supp-v1.zip]

A. Individual stimuli (shuffling)

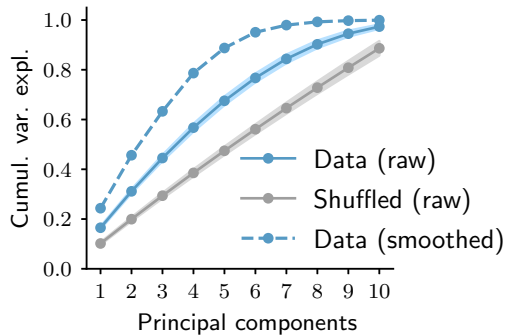

B. Individual stimuli (cvPCA)

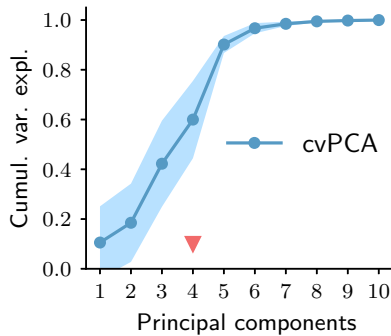

C. All stimuli (cvPCA)

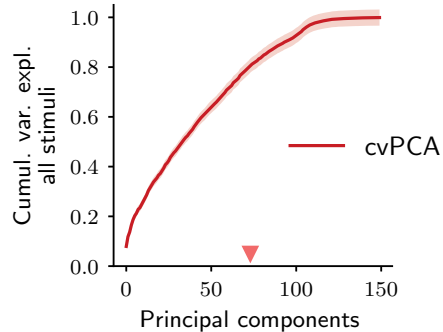

Supplement: supp [file elife-53151-supp-v1.zip]

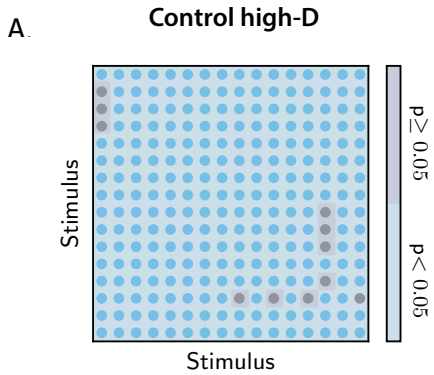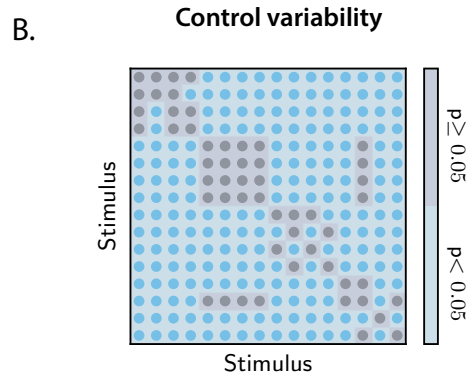

Supplement: supp [file elife-53151-supp-v1.zip]

A.

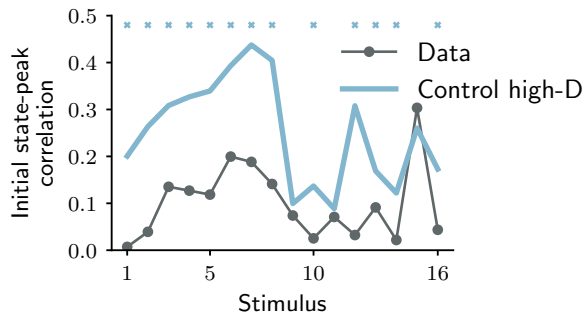

B.

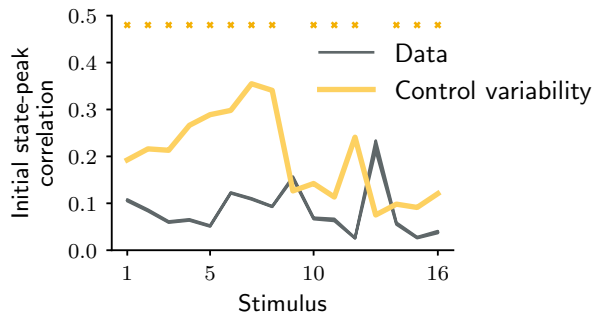

Supplement: supp [file elife-53151-supp-v1.zip]

A.

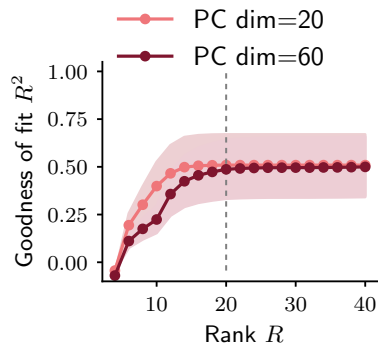

B.

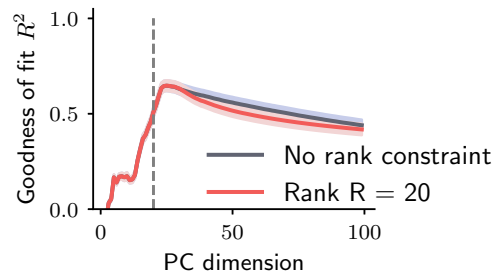

C.

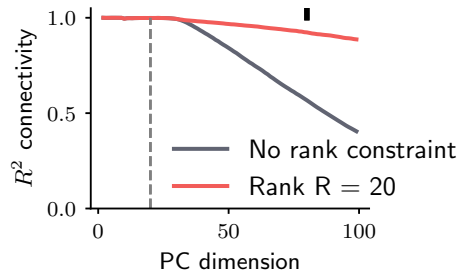

D.

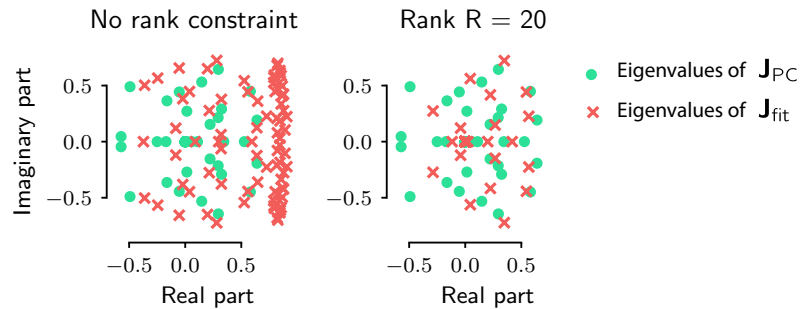

Supplement: supp [file elife-53151-supp-v1.zip]

A.

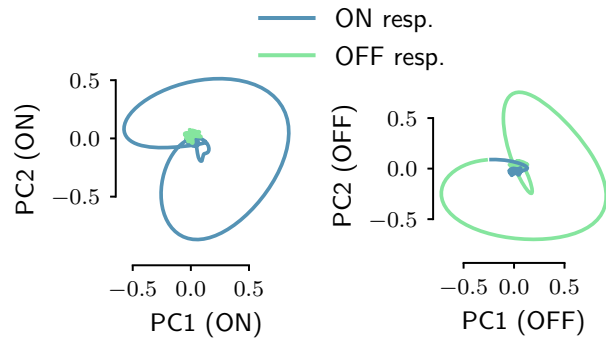

B.

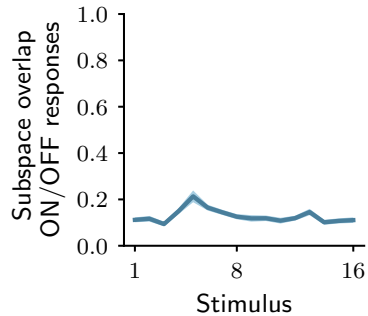

C.

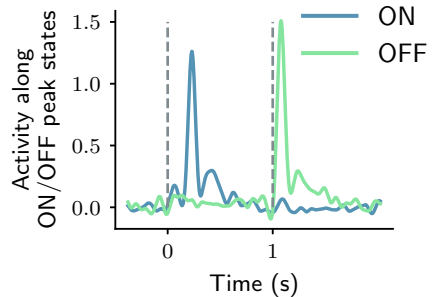

Supplement: supp [file elife-53151-supp-v1.zip]

A.

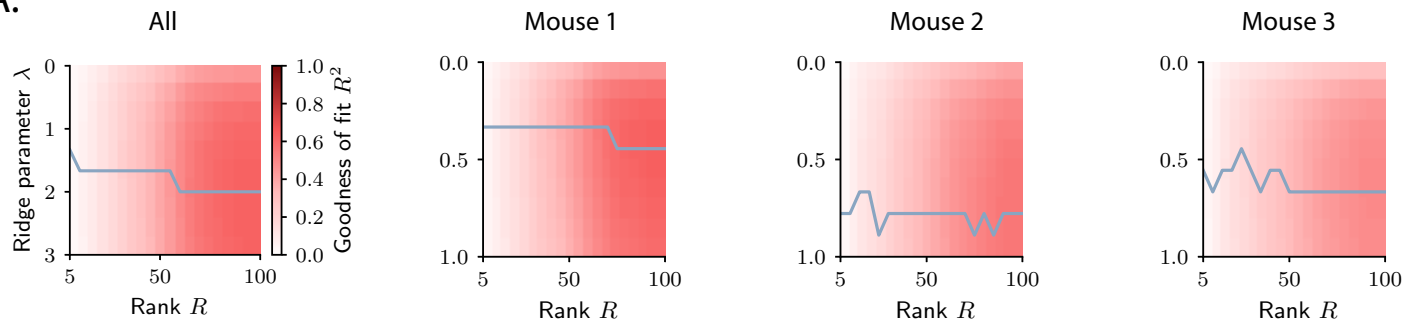

B.

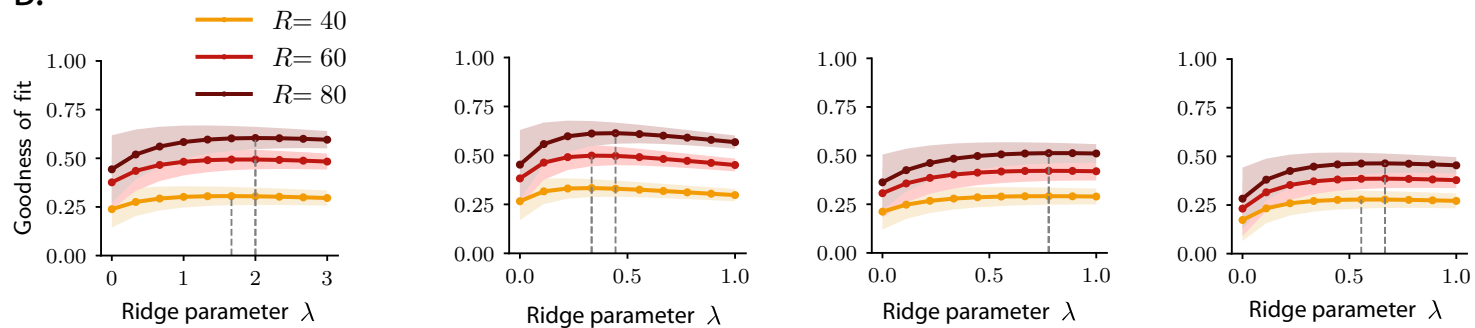

C.

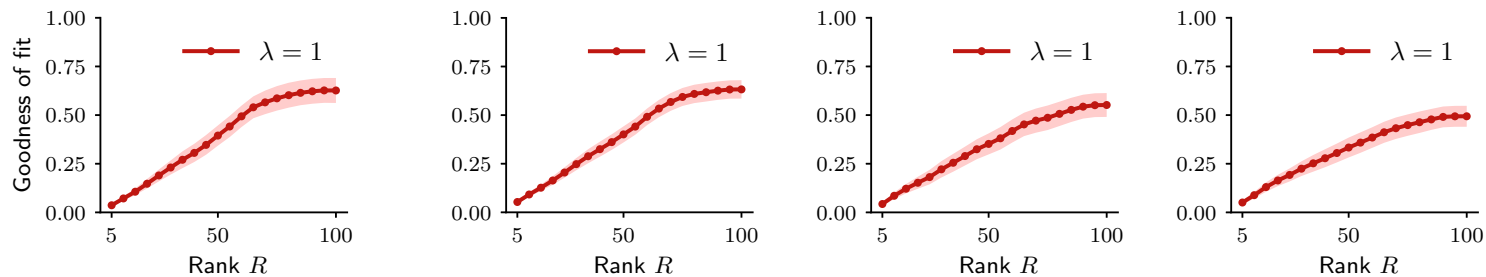

Supplement: supp [file elife-53151-supp-v1.zip]

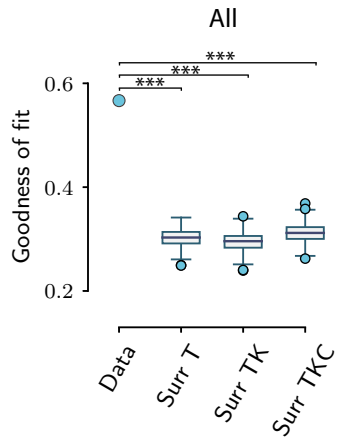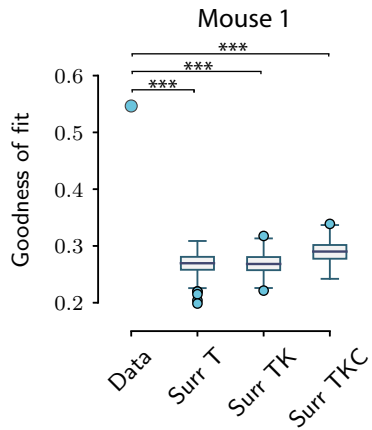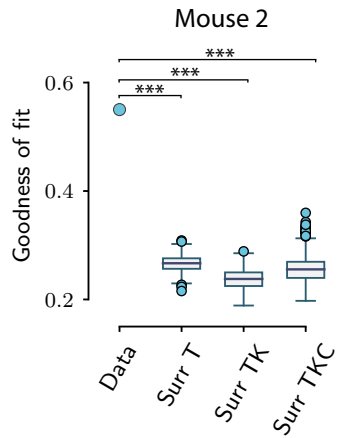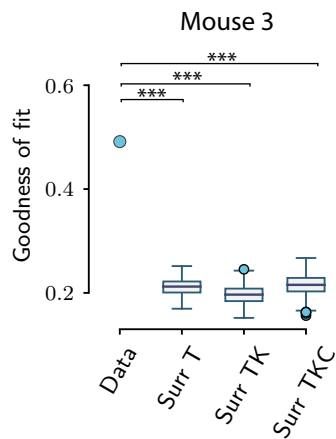

Supplement: supp [file elife-53151-supp-v1.zip]

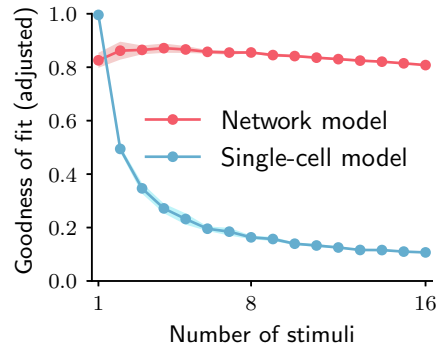

Supplement: supp [file elife-53151-supp-v1.zip]

A.

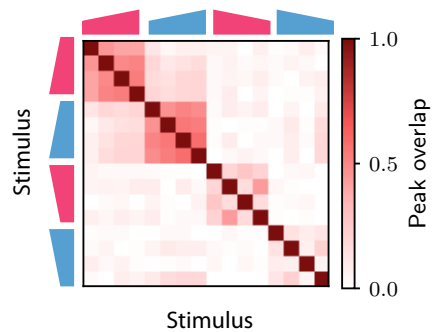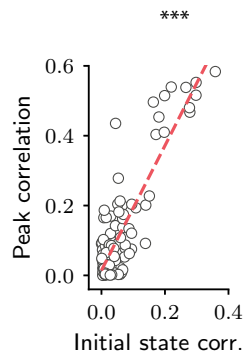

B.

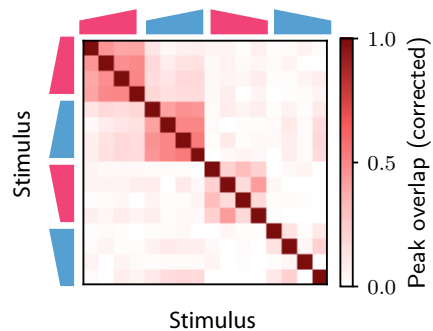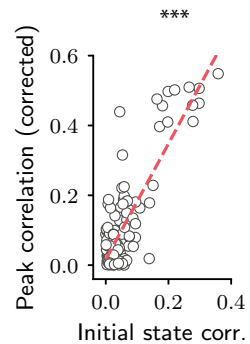

Supplement: supp [file elife-53151-supp-v1.zip]
